# Supplementary material
Source: PubMed Central journal article supplement (PMC3259656)
Supplement: supp_M801748200_aIIb_TM_supp_info.pdf [file supp_M801748200_aIIb_TM_supp_info.pdf]

## SUPPLEMENTARY INFORMATION

### Structure of the Integrin $\alpha$ IIb Transmembrane Segment

Tong-Lay Lau, Varun Dua and Tobias S. Ulmer

Department of Biochemistry & Molecular Biology and Zilkha Neurogenetic Institute, Keck School of Medicine, University of Southern California, 1501 San Pablo Street, Los Angeles, CA 90033

#### TABLE OF CONTENTS

|                                                                                                        |    |
|--------------------------------------------------------------------------------------------------------|----|
| <b>Supplemental Table 1.</b> Structural statistics for the $\alpha$ IIb transmembrane segment          | S2 |
| <b>Supplemental Table 2.</b> $\chi_1$ rotamer distribution of bicelle-embedded $\alpha$ IIb            | S3 |
| <b>Supplemental Figure 1.</b> Effect of lipid hydrocarbon chain length on $\alpha$ IIb chemical shifts | S4 |
| <b>Supplemental Figure 2.</b> H-N TROSY spectrum of bicelle-embedded $\alpha$ IIb                      | S5 |
| <b>Supplemental Figure 3.</b> Concentration dependence of $\alpha$ IIb spectral parameter              | S6 |
| <b>Supplemental Figure 4.</b> Sequence alignment of human integrin $\alpha$ and $\beta$ subunits       | S7 |
| <b>Supplemental Figure 5.</b> Structural neighbors of the integrin $\alpha$ IIb TM segment.            | S8 |

**Supplemental Table 1.** Structural statistics for the  $\alpha$ IIb transmembrane segment<sup>a</sup>

|                                                                                  |               |
|----------------------------------------------------------------------------------|---------------|
| R.m.s. deviations from experimental dihedral restraints (deg)                    |               |
| All (69) <sup>b</sup>                                                            | 0.32 ± 0.14   |
| R.m.s. deviations from experimental residual dipolar couplings (Hz) <sup>c</sup> |               |
| <sup>1</sup> D <sub>NH</sub> (28)                                                | 0.65 ± 0.02   |
| <sup>1</sup> D <sub>NC</sub> (27)                                                | 0.63 ± 0.04   |
| <sup>1</sup> D <sub>CoC</sub> (28)                                               | 0.76 ± 0.06   |
| R.m.s. deviations from experimental distance restraints (Å)                      |               |
| All (240)                                                                        | 0.08 ± 0.01   |
| Intraresidue (81)                                                                | 0.04 ± 0.01   |
| Interresidue sequential ( i - j  = 1) (69)                                       | 0.07 ± 0.01   |
| Interresidue short range (1 <  i - j  < 5) (78)                                  | 0.12 ± 0.01   |
| Interresidue long range ( i - j  ≥ 5) (12)                                       | 0.07 ± 0.01   |
| Deviations from idealized covalent geometry                                      |               |
| Bonds (Å)                                                                        | 0.004 ± 0.000 |
| Angles (deg)                                                                     | 0.587 ± 0.020 |
| Impropers (deg)                                                                  | 0.475 ± 0.014 |
| Coordinate precision (Å) <sup>d</sup>                                            |               |
| Backbone non-hydrogen atoms                                                      | 0.22          |
| All non-hydrogen atoms                                                           | 0.87          |
| Measures of structural quality                                                   |               |
| E <sub>LJ</sub> (kcal mol <sup>-1</sup> ) <sup>3 e</sup>                         | -127.9        |
| Residues in most favorable region of Ramachandran plot <sup>f</sup>              | 95.8%         |

A, Statistics for the 20 calculated simulated annealing structures, encompassing residues Ile966-Lys994.

B, Torsion angle restraints included 29  $\phi$ , 29  $\psi$ , and 11  $\chi_1$  angles.

C, R.m.s. deviations are normalized to an alignment tensor magnitude of 10 Hz.

D, Defined as the average r.m.s. difference between the final 20 simulated annealing structures and the mean coordinates.

E, The Lennard–Jones van der Waals energy was calculated with the CHARMM PARAM 19/20 parameters and was not included in the simulated annealing target function.

F, PROCHECK V3.4.4 (Roman A. Laskowski, Malcolm W. MacArthur, David S. Moss and Janet M. Thornton (1993). PROCHECK: a program to check the stereochemical quality of protein structures. J. Appl. Cryst., 26, 283-291)

**Supplemental Table 2.**  $\chi_1$  rotamer distribution of bicelle-embedded  $\alpha$ IIf.

| residue | $^3J_{C'CY}$ | $^3J_{NCY}$ | type | chi1 | flag <sup>a,b</sup> |
|---------|--------------|-------------|------|------|---------------------|
| 966     | 5.65         | -           | ILE  | -    | -                   |
| 967     | 3.09         | 0.04        | TRP  | -60  | loose               |
| 968     | 4.67         | 0.01        | TRP  | -60  | tight               |
| 969     | 4.06         | 1.96        | VAL  | -    | averaged            |
| 970     | 3.38         | 1.22        | LEU  | -    | averaged            |
| 971     | 3.97         | 2.13        | VAL  | -    | averaged            |
| 973     | 4.63         | 1.96        | VAL  | -    | averaged            |
| 974     | 3.01         | 0.62        | LEU  | -60  | loose               |
| 978     | 3.44         | 1.55        | LEU  | -    | averaged            |
| 979     | 3.65         | 1.28        | LEU  | -60  | loose               |
| 980     | 3.94         | 1.41        | LEU  | -60  | loose               |
| 981     | 2.46         | 1.97        | THR  | -    | averaged            |
| 982     | 4.09         | 2           | ILE  | -    | averaged            |
| 983     | 2.79         | 1.37        | LEU  | -    | averaged            |
| 984     | 3.81         | 2.04        | VAL  | -    | averaged            |
| 985     | 3.56         | 0.79        | LEU  | -60  | tight               |
| 987     | 5.1          | 0.84        | MET  | -60  | tight               |
| 988     | 0.01         | 2.68        | TRP  | 180  | tight               |
| 989     | 0.55         | 1.6         | LYS  | 180  | loose               |
| 990     | 1.74         | 1.23        | VAL  | -    | averaged            |
| 992     | 1.51         | 1.39        | PHE  | -    | averaged            |
| 993     | 3.54         | 0.65        | PHE  | -60  | tight               |
| 994     | 4.64         | 1.17        | LYS  | -60  | loose               |

a, In the present case, a tightly defined rotameric state is considered for  $^3J_{NCY}$  in either *trans* ( $2.4 \pm 0.6$  Hz) or *gauche* ( $\leq 0.8$  Hz) conformation and  $^3J_{C'CY}$  in either *trans* ( $4.0 \pm 0.6$  Hz) or *gauche* ( $\leq 1.1$  Hz) conformation. Loosely coupled states are considered for  $^3J_{NCY}$  in either *trans* ( $2.4 \pm 0.9$  Hz) or *gauche* ( $\leq 1.0$  Hz) conformation and  $^3J_{C'CY}$  in either *trans* ( $4.0 \pm 1.0$  Hz) or *gauche* ( $\leq 1.7$  Hz) conformation. In case of borderline values additional combinations are also considered.

b, For all averaged rotamers, the most probable rotameric state has been selected (c.f. Experimental Procedures).

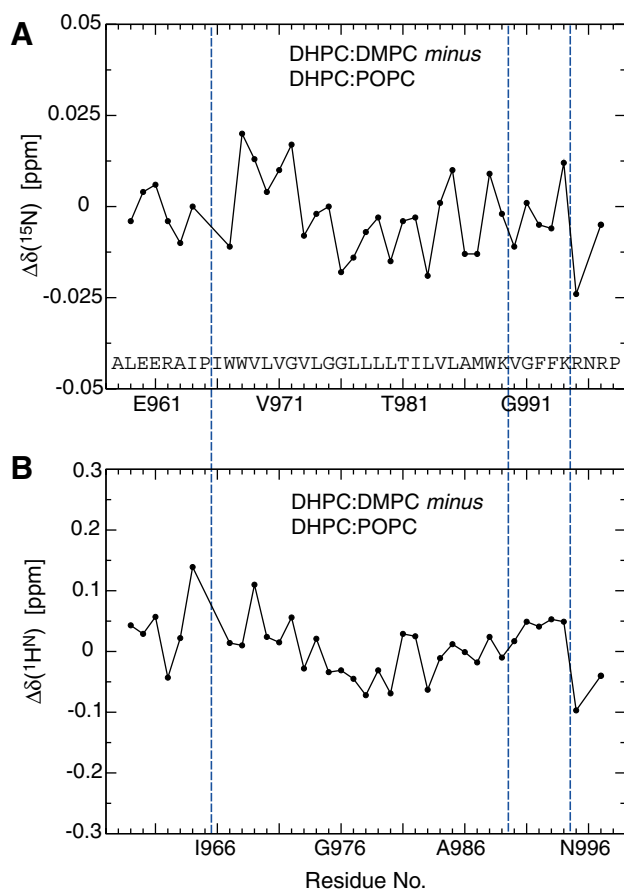

**Supplemental Figure 1.** Effect of lipid hydrocarbon chain length on  $\alpha\text{IIb}$  chemical shifts. H-N chemical shifts differences between bicelles utilizing POPC (1-Palmitoyl-2-Oleoyl-*sn*-Glycero-3-Phosphocholine) and DMPC (1,2-Dimyristoyl-*sn*-Glycero-3-Phosphocholine) as long-chain lipids, respectively. No significant chemical shifts differences are observed. Solution conditions were 105 mM long-chain lipids and 350 mM DHPC (1,2-Dihexanoyl-*sn*-Glycero-3-Phosphocholine), 25 mM HEPES·NaOH, pH 7.4, 6%  $\text{D}_2\text{O}$ , 0.02% w/v  $\text{NaN}_3$ .

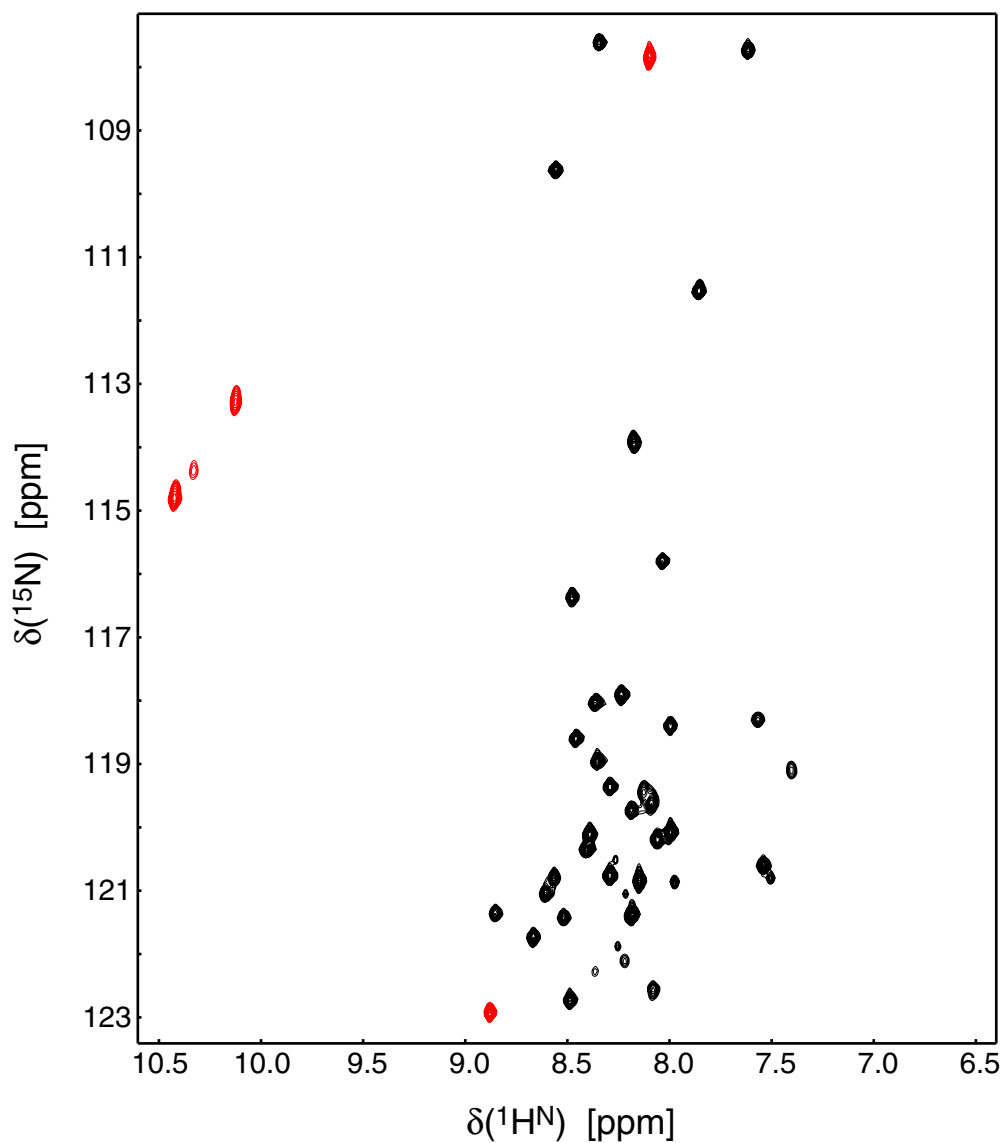

**Supplemental Figure 2.** H-N TROSY spectrum of bicelle-embedded  $\alpha$ IIb. Bicelles consisted of 105 mM POPC (1-Palmitoyl-2-Oleoyl-*sn*-Glycero-3-Phosphocholine), 350 mM DHPC (1,2-Dihexanoyl-*sn*-Glycero-3-Phosphocholine) in 25 mM HEPES-NaOH, pH 7.4, 6% D<sub>2</sub>O, 0.02% w/v NaN<sub>3</sub> solution. <sup>2</sup>H/<sup>13</sup>C/<sup>15</sup>N labeled  $\alpha$ IIb peptide is present at ~0.6 mM. The spectrum was recorded at 35 °C and a <sup>1</sup>H frequency of 700 MHz.

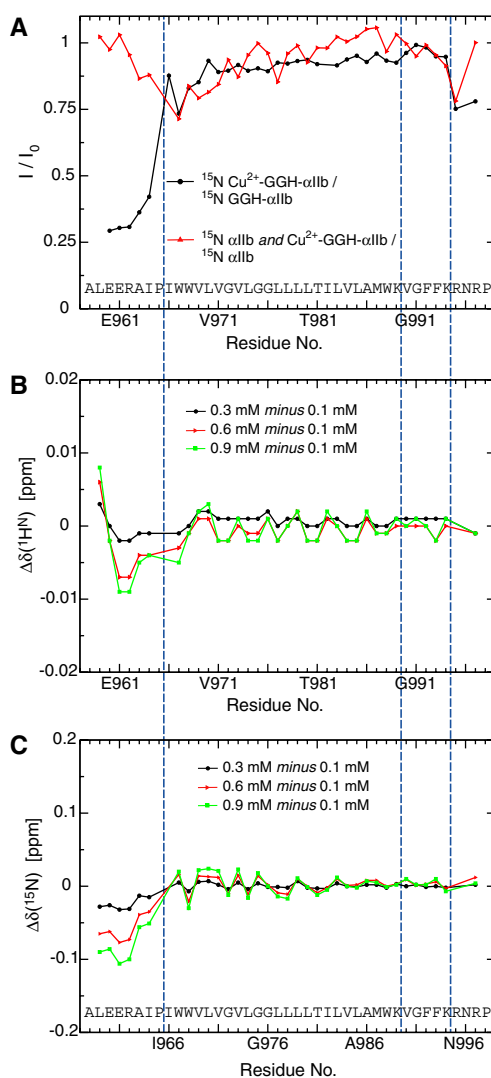

**Supplemental Figure 3.** Concentration dependence of  $\alpha$ IIb spectral parameter. **A**, Transfer of paramagnetic relaxation enhancement from amino terminal  $\text{Cu}^{2+}$ -tagged  $\alpha$ IIb peptides to untagged peptides. A high-affinity amino-terminal Gly957-Gly958-His959  $\text{Cu}^{2+}$ -binding site was introduced, which substantially broadens the intensities of  $^{15}\text{N}$  GGH- $\alpha$ IIb residues Glu960-I964, expressed as H-N TROSY signal intensity in the presence and absence of  $\text{Cu}^{2+}$ -loading,  $I/I_0$ . In contrast, no paramagnetic relaxation-induced broadening is transferred from 0.3 mM  $\text{Cu}^{2+}$ -GGH- $\alpha$ IIb to 0.3 mM  $^{15}\text{N}$   $\alpha$ IIb peptides. Experiments were performed in 105 mM POPC, 350 mM DHPC, 25 mM HEPES·NaOH, pH 7.4, 6%  $\text{D}_2\text{O}$ , 0.02% w/v  $\text{NaN}_3$  solution. **B-C**, Concentration dependence of  $\alpha$ IIb  $^1\text{H}^N$  and  $^{15}\text{N}$  chemical shifts. Shift changes compared to 0.1 mM  $^{15}\text{N}$   $\alpha$ IIb are plotted. The structured region (Ile966-Lys994) exhibits no significant shift changes. Very small shift changes are observed for the dynamically unstructured N-terminal residues, which may arise from increasing intermolecular collision at higher concentrations and/or minor differences in solution conditions between the samples. In contrast to the C-terminal residues, the N-terminal residues are more sensitive to changes in chemical environment (Fig. 2B-C). Shifts were measured in 105 mM POPC, 350 mM DHPC, 25 mM HEPES·NaOH, pH 7.4, 6%  $\text{D}_2\text{O}$ , 0.02% w/v  $\text{NaN}_3$  solution. The transmembrane helix (1966-K989) borders and the Lys994-Arg995 transition are marked in all panels by blue lines.

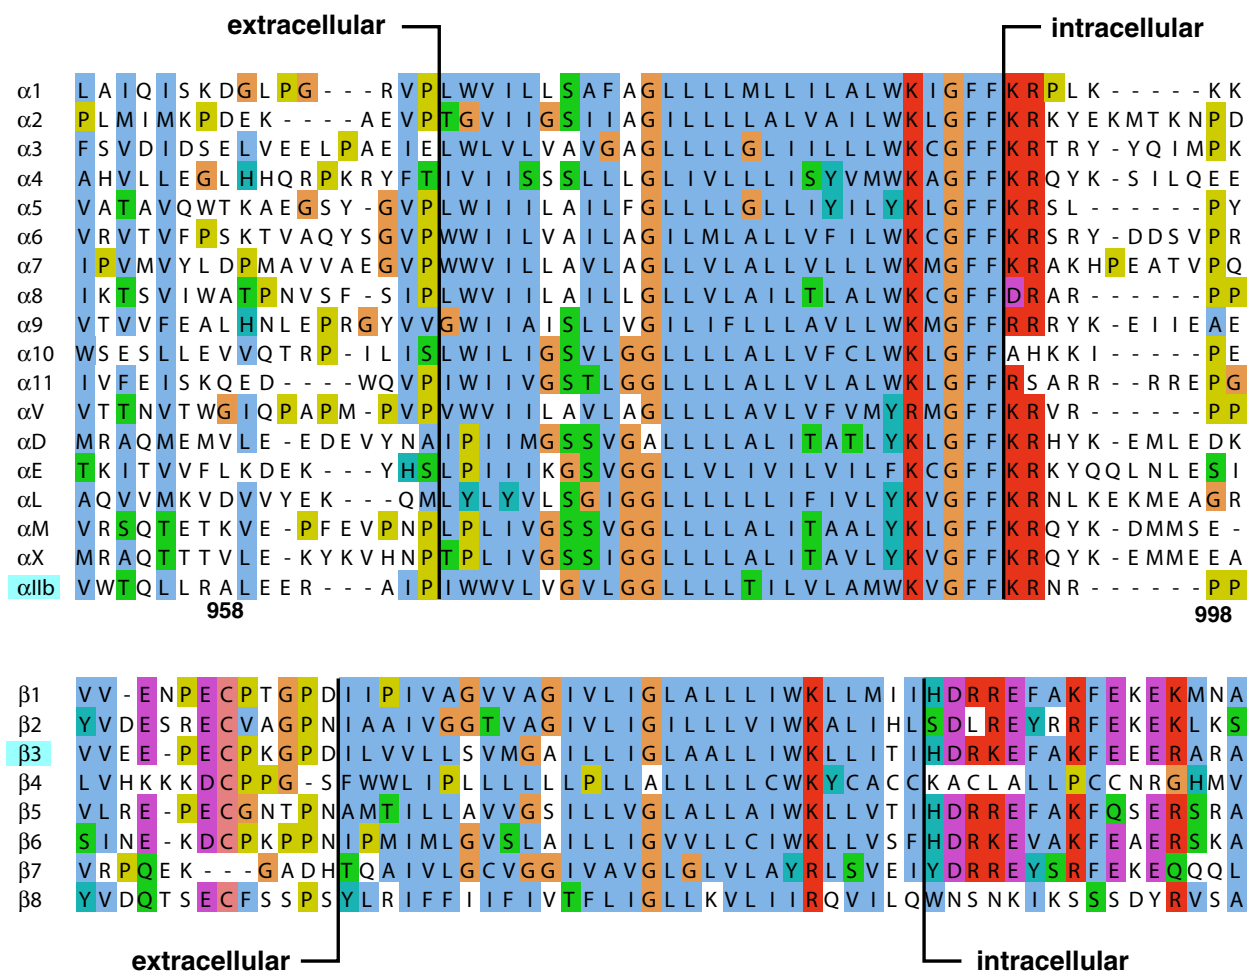

**Supplemental Figure 4.** Sequence alignment of all 18 human integrin  $\alpha$  subunits and all 8  $\beta$  subunits. Proposed minimal lipid tail-to-headgroup borders for monomeric  $\alpha$  and  $\beta$  subunits are depicted. Conserved amino acids are colored by the jalview multiple alignment editor using the Clustalx color scheme.

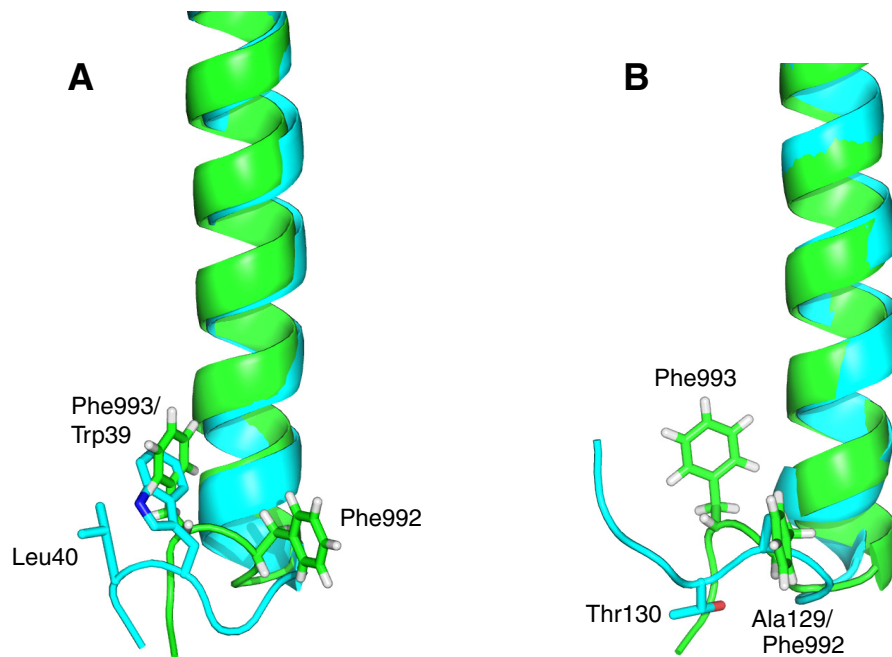

**Supplemental Figure 5.** Structural neighbors of the integrin  $\alpha$ IIb TM segment. A close structural homology was found for a  $\beta$  peptide from the light-harvesting protein B-800/850, homologous PDB entries 2fkw (chain S), 1nkz (chain F) and 1kzu (chain B). Panel **A**, shows the structural alignment of integrin  $\alpha$ IIb(Pro965-Arg995), in *green*, with chain F of 1nkz, in *cyan*. The side chains of  $\alpha$ IIb(Phe992-Phe993) and 1nkz-F(Trp39-Leu40) are shown in ball-and-stick representation. Phe993 and Trp39 are structurally homologous. A somewhat less close relative was found in cytochrome c oxidase, PDB entry 1xme (chain A), shown in *cyan* in panel **B**. The side chains of  $\alpha$ IIb(Phe992-Phe993) and 1xme-A(Ala129-Thr130) are shown in ball-and-stick representation. Phe992 and Ala129 are structurally homologous.
